# Supplementary material for: The nutritional and functional properties of 1-oleoyl-2-palmitoyl-3-linoleoylglycerol-rich oil: promoting early-life growth and intestinal health with alterations in the intestinal microbiota of Micropterus salmoides
Source: Royal Society of Chemistry journal article supplement (doi:10.1039/d2fo03755f), 2023-01-01

## **SUPPLEMENTARY**

Table S1. Ingredient formulation and the proximate composition of the different oils in experimental diets fed to fish.

Figure S1. Gas Chromatogram of fatty acid composition and sn-2 fatty acid composition of different oils in experimental diets. (A), (B) and (C) are chromatograms of the fatty acid composition of PPP, MO and OPL, respectively, and (D), (E) and (F) are chromatograms of sn-2 fatty acid composition of PPP, MO and OPL, respectively.

Figure S2. Microbial community diversity evaluated by alpha-diversity indices of ACE, Chao 1, Shannon, Simpson.

Table S1. Ingredient formulation and the proximate composition of the different oils in experimental diets fed to fish.

| Ingredients (%)                  | PPP group | MO group | OPL group |
|----------------------------------|-----------|----------|-----------|
| Fish meal                        | 16        | 16       | 16        |
| Corn gluten meal                 | 4         | 4        | 4         |
| Soybean meal                     | 24        | 24       | 24        |
| Peanut meal                      | 6         | 6        | 6         |
| Chicken powder                   | 30        | 30       | 30        |
| Beer yeast                       | 3         | 3        | 3         |
| Wheat flour                      | 6.7       | 6.7      | 6.7       |
| Freshwater fish premix           | 0.5       | 0.5      | 0.5       |
| Choline                          | 0.1       | 0.1      | 0.1       |
| Calcium dihydrogen phosphate     | 1         | 1        | 1         |
| Chromium trioxide                | 0.5       | 0.5      | 0.5       |
| Methionine                       | 0.2       | 0.2      | 0.2       |
| $\alpha$ - starch                | 2         | 2        | 2         |
| PPP                              | 6         | 0        | 0         |
| MO                               | 0         | 6        | 0         |
| OPL                              | 0         | 0        | 6         |
| <b>Proximate composition (%)</b> |           |          |           |
| Moisture                         | 8.31      | 8.43     | 8.36      |
| Crude protein                    | 48.36     | 48.53    | 48.78     |
| Crude lipid                      | 11.39     | 11.78    | 11.86     |
| Ash                              | 9.87      | 9.89     | 9.91      |

Figure S1. Gas Chromatogram of fatty acid composition and sn-2 fatty acid composition of different oils in experimental diets. (A), (B) and (C) are chromatograms of the fatty acid composition of PPP, MO and OPL, respectively, and (D), (E) and (F) are chromatograms of sn-2 fatty acid composition of PPP, MO and OPL, respectively.

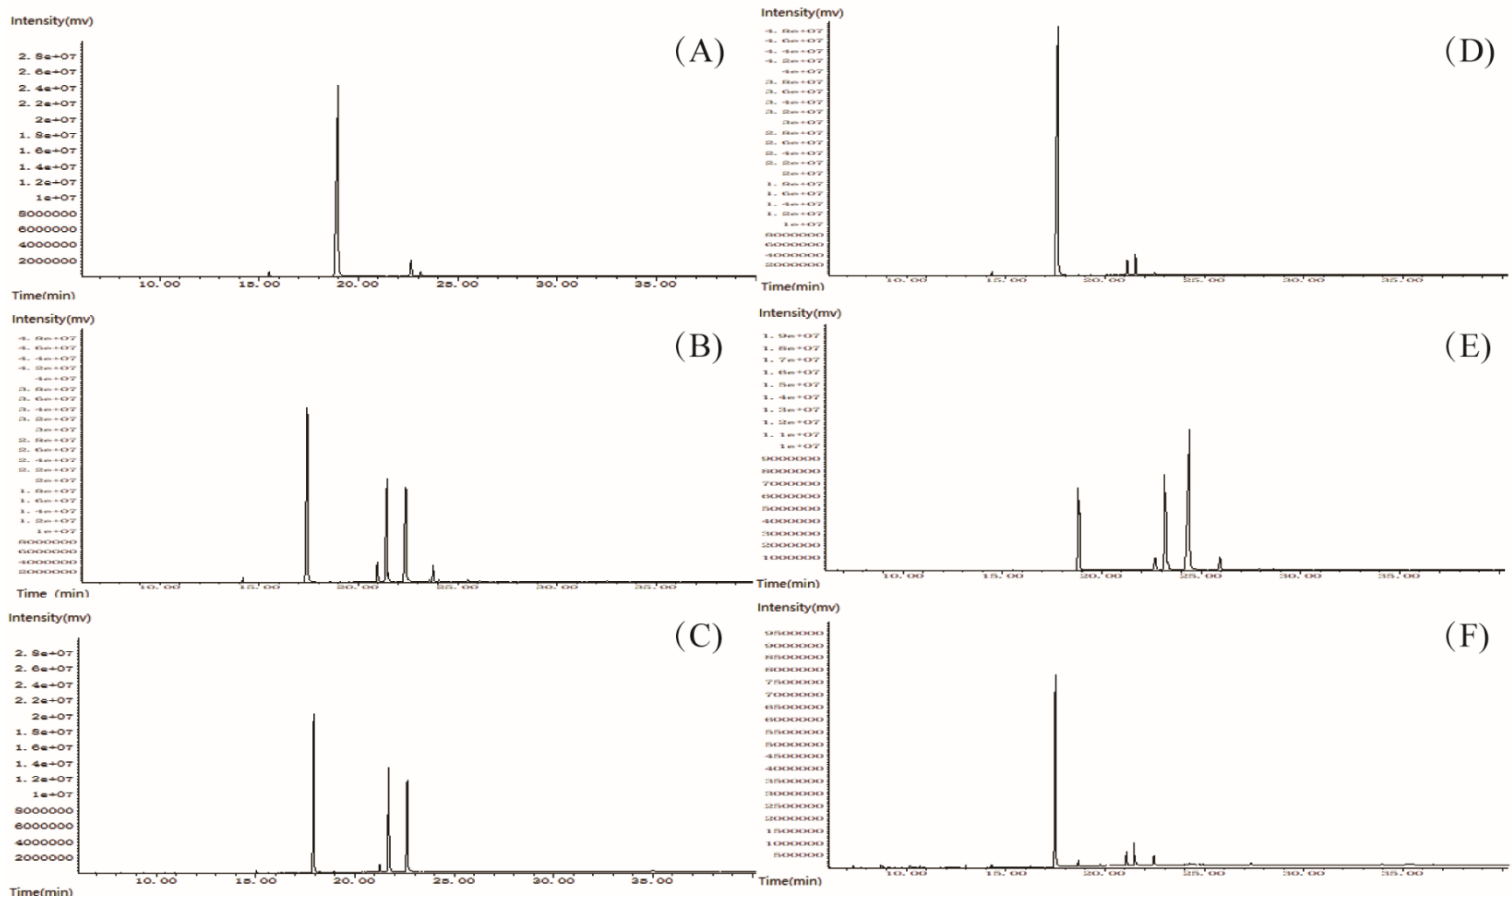

Figure S2. Microbial community diversity evaluated by alpha-diversity indices of ACE, Chao 1, Shannon, Simpson.

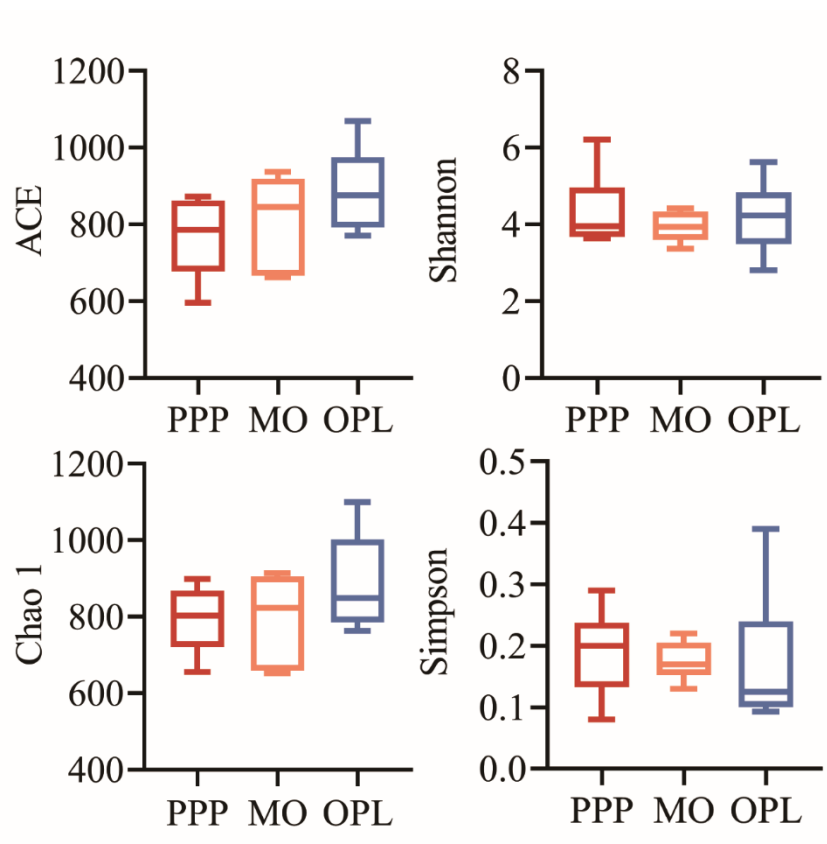

Supplement: d2fo03755f2.pdf [file d2fo03755f2.pdf]
