# Supplementary material for: The nutritional and functional properties of 1-oleoyl-2-palmitoyl-3-linoleoylglycerol-rich oil: promoting early-life growth and intestinal health with alterations in the intestinal microbiota of Micropterus salmoides
Source: Royal Society of Chemistry journal article supplement (doi:10.1039/d2fo03755f), 2023-01-01
Supplement: d2fo03755f1.xlsx [file d2fo03755f1.xlsx]

## Sheet: Community on Phylum level
Community on Phylum level
	PPP	MO	OPL
Firmicutes	0.792108	0.740821	0.408492
Actinobacteria	0.096382	0.170566	0.371178
Bacteria_Unclassified	0.0008	0.00230089	0.108865
Proteobacteria	0.073784	0.0513755	0.0569221
Unclassified	0.010604	0.010982	0.0255433
Bacteroidetes	0.018518	0.00602456	0.0108153
Fusobacteria	0.000322	0.0111265	0.00944812
Planctomycetes	0.000589	0.00397932	0.00422387
CandidatusSaccharibacteria	0.00578	0.000177847	0.00156728
Verrucomicrobia	0.000389	0.000889235	0.000855888
Others	0.000723041	0.00175624	0.0020897

## Sheet: Community on Genus level
Community on Genus level
	PPP	MO	OPL
Staphylococcus	0.425332	0.359384	0.197577
Aurantimicrobium	0.0239426	0.0998388	0.186083
Rathayibacter	0.0512088	0.0548324	0.141833
Bacillus	0.181248	0.23249	0.112266
Romboutsia	0.0691713	0.0875452	0.0417273
Unclassified	0.0106041	0.010982	0.0255433
Lactobacillus	0.00591341	0.00409048	0.00611349
Salmonella	0.0111488	0.00927027	0.00563552
Candidatus Berkiella	0.0187851	0.00381259	0.00346802
Acinetobacter	0.00251209	0.00210082	0.00213416
Streptomyces	1.11154e-05	0.000433502	0.0341577
Phreatobacter	0.0012227	0	0.0063358
Bosea	0.00251209	0.000911466	0.00527983
Lawsonibacter	0.000666926	0.000133385	0.00350136
Fuscovulum	0.000466848	0.000800311	0.00330128
Ruminococcus	0.000822542	0.000200078	0.00304563
Muribaculum	0.00012227	0.000300117	0.00274551
Mesorhizobium	0.000377925	0.000544656	0.00261213
Bacteria_Unclassified	0.000800311	0.00303451	0.109242
Cetobacterium	0.000322352	0.00248986	0.00944812
Eisenbergiella	0.00641361	0.00102262	0.00473518
Phocea	0.0233758	0	0
Phocaeicola	0.0117379	0.000978158	0.00108931
Pseudoruminococcus	0.010404	0.000722503	0.000155616
Candidatus Saccharimonas	0.00578003	0.000177847	0.00156728
Serratia	0.00527983	0.00112266	0.000666926
Frankia	0.00513533	0.00188962	0.000466848
Novosphingobium	0.00484633	0.000422386	5.55772e-05
Agathobacter	0.00264547	0.000366809	0.00063358
Clostridium	0.00326794	0.00688045	0.00114489
Escherichia	0.00170066	0.0158728	0.000644695
Ligilactobacillus	0.00163397	0.0108375	0.000400156
Nesterenkonia	0.00226755	0.00280109	0.00161174
Bremerella	8.89235e-05	0.0022342	0.000933696
Blautia	0.00038904	0.00213416	0.000844773
Megasphaera	0.00305674	3.33463e-05	0.00100039
Faecalibacterium	0.00140055	0.00202301	0.000300117
Rothia	0.00213416	0.0019452	0.000855888
Others	0.102851	0.0667037	0.0808425

## Sheet: LEfSE_Different taxa_OPL vs PPP
LEfSE_LDA_Different taxa_OPL vs PPP
OTU_taxa	Abundance	Group	LDA score	P-Value
Bacteria.Firmicutes.Clostridia.Eubacteriales.Lachnospiraceae.Anaerobutyricum	2.65871	PPP	3.2135	0.0186029
Bacteria.Firmicutes.Bacilli.Bacillales.Bacillaceae.Bacillus	5.25827	PPP	4.51012	0.0472018
Bacteria.Deinococcus_Thermus.Deinococci.Deinococcales.Deinococcaceae.Deinococcus	2.56444	PPP	3.27078	0.00534568
Bacteria.Firmicutes.Bacilli.Bacillales.Staphylococcaceae.Staphylococcus.Staphylococcus_nepalensis	5.57516	PPP	5.00842	0.0282801
Bacteria.Deinococcus_Thermus	2.56444	PPP	3.27071	0.00534568
Bacteria.Actinobacteria.Actinomycetia.Streptomycetales.Streptomycetaceae.Streptomyces	4.53349	OPL	4.23148	0.00705833
Bacteria.Firmicutes.Bacilli.Bacillales.Bacillaceae	5.27358	PPP	4.51061	0.0472018
Bacteria.Proteobacteria.Gammaproteobacteria.Legionellales.Coxiellaceae	4.28896	PPP	3.84083	0.0162936
Bacteria.Firmicutes.Clostridia.Eubacteriales.Peptostreptococcaceae	4.84877	PPP	4.12131	0.0282801
Bacteria.Firmicutes.Bacilli.Bacillales.Staphylococcaceae.Staphylococcus.Staphylococcus_kloosii	4.14214	PPP	3.5346	0.0162936
Bacteria.Actinobacteria.Actinomycetia.Frankiales	3.71057	PPP	3.33634	0.00881586
Bacteria.Actinobacteria.Coriobacteriia	3.50229	PPP	3.18987	0.027803
Bacteria.Firmicutes.Clostridia.Eubacteriales.Oscillospiraceae.Phocea	4.36877	PPP	4.10354	0.00534568
Bacteria.Proteobacteria.Gammaproteobacteria.Chromatiales	1.89102	OPL	3.696	0.0168274
Bacteria.Firmicutes.Clostridia.Eubacteriales.Oscillospiraceae.Phocea.Phocea_massiliensis	4.36877	PPP	4.10354	0.00534568
Bacteria.Actinobacteria.Actinomycetia.Frankiales.Frankiaceae.Frankia.Frankia_coriariae	3.67227	PPP	3.31808	0.00820774
Bacteria.Firmicutes.Bacilli.Bacillales.Staphylococcaceae.Staphylococcus.Staphylococcus_xylosus_A	4.05876	PPP	3.41697	0.0472018
Bacteria.Proteobacteria.Gammaproteobacteria.Enterobacterales.Enterobacteriaceae.Salmonella.Salmonella_enterica	4.04723	PPP	3.45695	0.0472018
Bacteria.Fusobacteria.Fusobacteriia.Fusobacteriales	3.97535	OPL	3.72878	0.00881586
Bacteria.Actinobacteria.Actinomycetia	5.56909	OPL	5.1442	0.0282801
Bacteria.Firmicutes.Clostridia.Eubacteriales.Peptostreptococcaceae.Peptostreptococcus	2.42614	PPP	3.10817	0.0186029
Bacteria.Deinococcus_Thermus.Deinococci.Deinococcales	2.56444	PPP	3.27082	0.00534568
Bacteria.Fusobacteria	3.97535	OPL	3.72973	0.00881586
Bacteria.Actinobacteria.Actinomycetia.Streptomycetales.Streptomycetaceae.Streptomyces.Streptomyces_mutabilis	4.53292	OPL	4.2311	0.00534568
Bacteria.Firmicutes.Negativicutes.Veillonellales	3.53306	PPP	3.08937	0.0162936
Bacteria.Proteobacteria.Gammaproteobacteria.Chromatiales.Ectothiorhodospiraceae	1.89102	OPL	3.68515	0.0168274
Bacteria.Firmicutes.Clostridia.Eubacteriales.Peptostreptococcaceae.Romboutsia.Romboutsia_ilealis	4.82624	PPP	4.08693	0.0282801
Bacteria.Proteobacteria.Gammaproteobacteria.Enterobacterales.Enterobacteriaceae	4.17562	PPP	3.62656	0.0162936
Bacteria.Actinobacteria.Actinomycetia.Corynebacteriales.Corynebacteriaceae	2.85211	PPP	3.10752	0.0342661
Bacteria.Actinobacteria.Actinomycetia.Micrococcales.Microbacteriaceae.Aurantimicrobium.Aurantimicrobium_minutum	5.26911	OPL	4.90421	0.0162936
Bacteria.Firmicutes.Clostridia.Eubacteriales.Eubacteriales_Family_XIII__Incertae_Sedis.Emergencia.Emergencia_timonensis	2.92099	PPP	3.28154	0.0441713
Bacteria.Deinococcus_Thermus.Deinococci.Deinococcales.Deinococcaceae	2.56444	PPP	3.27073	0.00534568
Bacteria.Firmicutes	5.89878	PPP	5.28207	0.0282801
Bacteria.Firmicutes.Bacilli.Bacillales.Staphylococcaceae	5.62897	PPP	5.04601	0.0282801
Bacteria.Proteobacteria.Gammaproteobacteria	4.70774	PPP	4.17162	0.0282801
Bacteria.Actinobacteria.Actinomycetia.Streptosporangiales	3.07531	OPL	3.01093	0.0259215
Bacteria.Actinobacteria.Actinomycetia.Micrococcales	5.523	OPL	5.10108	0.0282801
Bacteria.Firmicutes.Bacilli	5.79934	PPP	5.1635	0.0472018
Bacteria.Actinobacteria.Actinomycetia.Streptosporangiales.Nocardiopsaceae.Nocardiopsis	3.07531	OPL	3.05341	0.0116673
Bacteria.Proteobacteria.Gammaproteobacteria.Enterobacterales.Enterobacteriaceae.Salmonella	4.04723	PPP	3.45695	0.0472018
Bacteria.Actinobacteria.Actinomycetia.Micrococcales.Microbacteriaceae.Aurantimicrobium	5.26971	OPL	4.90488	0.0162936
Bacteria.Bacteroidetes.Bacteroidia.Bacteroidales.Bacteroidaceae.Phocaeicola.Phocaeicola_plebeius	2.63699	PPP	3.11652	0.0181523
Bacteria.Actinobacteria	5.56958	OPL	5.13927	0.0282801
Bacteria.Fusobacteria.Fusobacteriia.Fusobacteriales.Fusobacteriaceae.Cetobacterium	3.97535	OPL	3.72976	0.00881586
Bacteria.Deinococcus_Thermus.Deinococci	2.56444	PPP	3.27076	0.00534568
Bacteria.Proteobacteria.Betaproteobacteria.Burkholderiales.Oxalobacteraceae	2.98545	PPP	3.15007	0.0186029
Bacteria.Fusobacteria.Fusobacteriia.Fusobacteriales.Fusobacteriaceae	3.97535	OPL	3.72899	0.00881586
Bacteria.Actinobacteria.Actinomycetia.Micrococcales.Microbacteriaceae	5.5194	OPL	5.10591	0.0282801
Bacteria.Proteobacteria.Alphaproteobacteria.Rhodobacterales.Roseobacteraceae.Ketogulonicigenium.Ketogulonicigenium_vulgare	3.41514	OPL	3.12044	0.027803
Bacteria.Actinobacteria.Actinomycetia.Streptosporangiales.Nocardiopsaceae	3.07531	OPL	3.0076	0.0259215
Bacteria.Actinobacteria.Actinomycetia.Micrococcales.Microbacteriaceae.Leifsonia.Leifsonia_sp900100265	2.08732	OPL	3.6047	0.0181523
Bacteria.Firmicutes.Negativicutes	3.66918	PPP	3.27273	0.0162936
Bacteria.Firmicutes.Negativicutes.Veillonellales.Veillonellaceae	3.53306	PPP	3.08937	0.0162936
Bacteria.Planctomycetes.Planctomycetia	3.62571	OPL	3.27507	0.027803
Bacteria.Firmicutes.Bacilli.Bacillales.Staphylococcaceae.Staphylococcus	5.62873	PPP	5.0457	0.0282801
Bacteria.Actinobacteria.Actinomycetia.Frankiales.Frankiaceae.Frankia	3.71057	PPP	3.33779	0.00881586
Bacteria.Firmicutes.Clostridia.Eubacteriales.Lachnospiraceae.Faecalimonas.Faecalimonas_phoceensis	3.14284	PPP	3.02476	0.0342661
Bacteria.Actinobacteria.Actinomycetia.Micrococcales.Microbacteriaceae.Yonghaparkia	1.94902	OPL	3.57077	0.0181523
Bacteria.Firmicutes.Clostridia.Eubacteriales.Peptostreptococcaceae.Romboutsia	4.83993	PPP	4.10333	0.0282801
Bacteria.Actinobacteria.Actinomycetia.Streptomycetales	4.53349	OPL	4.23149	0.00705833
Bacteria.Verrucomicrobia.Verrucomicrobiae.Verrucomicrobiales.Akkermansiaceae.Akkermansia	2.44387	PPP	3.20014	0.0181523
Bacteria.Actinobacteria.Actinomycetia.Micrococcales.Microbacteriaceae.Yonghaparkia.Yonghaparkia_sp012530535	1.94902	OPL	3.68694	0.0181523
Bacteria.Proteobacteria.Gammaproteobacteria.Legionellales.Coxiellaceae.Candidatus_Berkiella	4.27381	PPP	3.83263	0.0162936
Unclassified	4.40728	OPL	3.86698	0.0162936
Bacteria.Proteobacteria.Betaproteobacteria.Burkholderiales.Oxalobacteraceae.Massilia	2.78629	PPP	3.17253	0.0186029
Bacteria.Fusobacteria.Fusobacteriia.Fusobacteriales.Fusobacteriaceae.Cetobacterium.Cetobacterium_sp014250685	3.97535	OPL	3.72977	0.00881586
Bacteria.Proteobacteria.Gammaproteobacteria.Enterobacterales	4.32491	PPP	3.8256	0.0282801
Bacteria.Verrucomicrobia.Verrucomicrobiae.Verrucomicrobiales.Akkermansiaceae	2.44387	PPP	3.02858	0.0181523
Bacteria.Proteobacteria.Gammaproteobacteria.Legionellales	4.34522	PPP	3.86292	0.0282801
Bacteria.Actinobacteria.Actinomycetia.Corynebacteriales.Corynebacteriaceae.Corynebacterium	2.85211	PPP	3.11541	0.0342661
Bacteria.Actinobacteria.Actinomycetia.Streptomycetales.Streptomycetaceae	4.53349	OPL	4.23149	0.00705833
Bacteria.Firmicutes.Clostridia.Eubacteriales.Eubacteriales_Family_XIII__Incertae_Sedis.Mogibacterium	3.32696	PPP	3.14738	0.0186029
OTU_taxa	Abundance	Group	LDA score	P-Value
Bacteria.Actinobacteria.Actinomycetia.Frankiales.Frankiaceae	3.71057	PPP	3.33659	0.00881586
Bacteria.Proteobacteria.Alphaproteobacteria.Rhodobacterales.Roseobacteraceae.Ketogulonicigenium	3.41514	OPL	3.11629	0.027803
Bacteria.Actinobacteria.Actinomycetia.Streptosporangiales.Nocardiopsaceae.Nocardiopsis.Nocardiopsis_kunsanensis	3.07123	OPL	3.07844	0.00800994
Bacteria.Proteobacteria.Alphaproteobacteria.Rhodobacterales	4.05196	OPL	3.60055	0.0472018
Bacteria.Proteobacteria.Gammaproteobacteria.Pseudomonadales.Moraxellaceae.Acinetobacter.Acinetobacter_johnsonii	2.94902	PPP	3.02937	0.0268567
Bacteria.Bacteroidetes.Bacteroidia.Bacteroidales.Bacteroidaceae.Phocaeicola.Phocaeicola_plebeius_A	3.75008	PPP	3.45832	0.0186029
Bacteria.Firmicutes.Bacilli.Bacillales.Bacillaceae.Bacillus.Bacillus_amyloliquefaciens	4.94717	PPP	4.27343	0.0472018
Bacteria.Proteobacteria.Gammaproteobacteria.Legionellales.Coxiellaceae.Candidatus_Berkiella.uncultured_bacterium	4.27278	PPP	3.84815	0.0162936
Bacteria.Fusobacteria.Fusobacteriia	3.97535	OPL	3.72946	0.00881586
Bacteria.Planctomycetes	3.62571	OPL	3.27096	0.027803
Bacteria.Firmicutes.Negativicutes.Veillonellales.Veillonellaceae.Megasphaera.Megasphaera_elsdenii	3.47244	PPP	3.10308	0.0162936
Bacteria.Actinobacteria.Coriobacteriia.Coriobacteriales	3.33596	PPP	3.04022	0.0150186
Bacteria.Proteobacteria.Alphaproteobacteria.Rhodobacterales.Roseobacteraceae	3.56706	OPL	3.1515	0.0472018
Bacteria.Firmicutes.Negativicutes.Veillonellales.Veillonellaceae.Megasphaera	3.48526	PPP	3.04344	0.0162936
Bacteria.Planctomycetes.Planctomycetia.Pirellulales.Pirellulaceae.Bremerella	2.97021	OPL	3.02272	0.0330332
Bacteria.Firmicutes.Clostridia.Eubacteriales.Clostridiaceae.Clostridium	3.51427	PPP	3.10518	0.00902344
Bacteria	5.99537	PPP	3.86745	0.0162936

## Sheet: LEfSE_Different_taxa_OPL vs MO
LEfSE_LDA_Different taxa_OPL vs MO
OTU_taxa	Abundance	Group	LDA score	P-Value
Bacteria.Firmicutes.Bacilli.Bacillales.Bacillaceae.Bacillus	5.36641	MO	4.73458	0.0282801
Bacteria.Firmicutes.Bacilli.Bacillales.Staphylococcaceae.Staphylococcus.Staphylococcus_nepalensis	5.49206	MO	4.78814	0.0472018
Bacteria.Proteobacteria.Alphaproteobacteria.Hyphomicrobiales.norank.Nordella	3.27381	OPL	3.07066	0.0441713
Bacteria.Actinobacteria.Actinomycetia.Streptomycetales.Streptomycetaceae.Streptomyces	4.53349	OPL	4.25751	0.00881586
Bacteria.Firmicutes.Bacilli.Bacillales.Bacillaceae	5.37897	MO	4.73907	0.0282801
Bacteria.Firmicutes.Clostridia.Eubacteriales.Peptostreptococcaceae	4.95361	MO	4.3177	0.0162936
Bacteria.Proteobacteria.Alphaproteobacteria.Hyphomicrobiales.Boseaceae.Bosea	3.72262	OPL	3.33556	0.0159707
Bacteria.Proteobacteria.Alphaproteobacteria.Rhodobacterales.Rhodobacteraceae	3.87971	OPL	3.56765	0.0263877
Bacteria.Proteobacteria.Betaproteobacteria	3.3619	MO	3.01676	0.046533
Bacteria.Actinobacteria.Actinomycetia.Propionibacteriales	3.25811	MO	3.03933	0.0211767
Bacteria.Firmicutes.Bacilli.Bacillales.Bacillaceae.Bacillus.Bacillus_sp013155385	5.04558	MO	4.42222	0.0162936
Bacteria.Actinobacteria.Actinomycetia.Streptomycetales.Streptomycetaceae.Streptomyces.Streptomyces_mutabilis	4.53292	OPL	4.25712	0.00881586
Bacteria.Proteobacteria.Alphaproteobacteria.Hyphomicrobiales.Pseudoxanthobacteraceae.Pseudoxanthobacter	2.00017	OPL	3.56557	0.0495346
Bacteria.Proteobacteria.Alphaproteobacteria.Hyphomicrobiales.Pseudoxanthobacteraceae	2.00017	OPL	3.33594	0.0495346
Bacteria.Firmicutes.Clostridia.Eubacteriales.Peptostreptococcaceae.Romboutsia.Romboutsia_ilealis	4.93055	MO	4.28919	0.0162936
Bacteria.Proteobacteria.Alphaproteobacteria.Hyphomicrobiales	4.30288	OPL	3.94115	0.0282801
Bacteria.Proteobacteria.Gammaproteobacteria.Enterobacterales.Enterobacteriaceae	4.42177	MO	3.76776	0.0282801
Bacteria.Proteobacteria.Alphaproteobacteria	4.50862	OPL	4.11821	0.0162936
Bacteria.Firmicutes.Bacilli.Bacillales.Bacillaceae.Bacillus.Bacillus_subtilis	4.17206	MO	3.47963	0.0472018
Bacteria.Firmicutes	5.86971	MO	5.15847	0.0282801
Bacteria.Actinobacteria.Actinomycetia.Propionibacteriales.Propionibacteriaceae	3.25811	MO	3.06044	0.0196244
Bacteria.Firmicutes.Bacilli.Bacillales.Staphylococcaceae	5.5561	MO	4.83503	0.0472018
Bacteria.Proteobacteria.Gammaproteobacteria	4.61307	MO	3.82061	0.0472018
Bacteria.Proteobacteria.Alphaproteobacteria.Hyphomicrobiales.Phreatobacteraceae	3.8018	OPL	3.51321	0.0186029
Bacteria.Proteobacteria.Alphaproteobacteria.Hyphomicrobiales.Phreatobacteraceae.Phreatobacter	3.8018	OPL	3.51321	0.0186029
Bacteria.Firmicutes.Bacilli	5.7938	MO	5.11136	0.0282801
Bacteria.Firmicutes.Clostridia.Eubacteriales.Clostridiaceae.Clostridium.Clostridium_paraputrificum	3.52305	MO	3.13969	0.0211767
Bacteria.Firmicutes.Bacilli.Bacillales.Staphylococcaceae.Staphylococcus.Staphylococcus_saprophyticus	4.2421	MO	3.48371	0.0472018
Bacteria.Proteobacteria.Alphaproteobacteria.Rhodobacterales.Roseobacteraceae.Ketogulonicigenium.Ketogulonicigenium_vulgare	3.41514	OPL	3.0525	0.0355788
Bacteria.Proteobacteria.Alphaproteobacteria.Hyphomicrobiales.Boseaceae	3.72262	OPL	3.34005	0.0159707
Bacteria.Firmicutes.Bacilli.Bacillales.Staphylococcaceae.Staphylococcus	5.55556	MO	4.8337	0.0472018
Bacteria.Firmicutes.Clostridia.Eubacteriales.Peptostreptococcaceae.Romboutsia	4.94223	MO	4.29804	0.0162936
Bacteria.Actinobacteria.Actinomycetia.Streptomycetales	4.53349	OPL	4.25764	0.00881586
Unclassified	4.40728	OPL	3.8475	0.00902344
Bacteria.Actinobacteria.Actinomycetia.Propionibacteriales.Propionibacteriaceae.Cutibacterium	3.25811	MO	3.06183	0.0196244
Bacteria.Firmicutes.Bacilli.Bacillales.Bacillaceae.Bacillus.Bacillus_inaquosorum	2.12511	MO	3.40754	0.018881
OTU_taxa	Abundance	Group	LDA score	P-Value
Bacteria.Proteobacteria.Alphaproteobacteria.Hyphomicrobiales.Pseudoxanthobacteraceae.Pseudoxanthobacter.Pseudoxanthobacter_sp009600605	2.00017	OPL	3.54241	0.0495346
Bacteria.Actinobacteria.Actinomycetia.Streptomycetales.Streptomycetaceae	4.53349	OPL	4.25745	0.00881586
Bacteria.Proteobacteria.Alphaproteobacteria.Rhodobacterales.Roseobacteraceae.Ketogulonicigenium	3.41514	OPL	3.05874	0.0355788
Bacteria.Proteobacteria.Alphaproteobacteria.Rhodobacterales	4.05196	OPL	3.72192	0.027803
Bacteria.Proteobacteria.Alphaproteobacteria.Hyphomicrobiales.Phreatobacteraceae.Phreatobacter.uncultured_bacterium	3.79566	OPL	3.50784	0.0186029
Bacteria.Firmicutes.Bacilli.Bacillales.Bacillaceae.Bacillus.Bacillus_amyloliquefaciens	5.01113	MO	4.37868	0.0472018
Bacteria.Firmicutes.Bacilli.Bacillales.Paenibacillaceae.Aneurinibacillus	1.52305	MO	3.63487	0.0495346
Bacteria.Proteobacteria.Alphaproteobacteria.Rhodobacterales.Roseobacteraceae	3.56706	OPL	3.21905	0.0159707
Bacteria.Proteobacteria.Alphaproteobacteria.Hyphomicrobiales.Boseaceae.Bosea.Bosea_sp900466745	3.63588	OPL	3.25356	0.046533
Bacteria.Firmicutes.Bacilli.Bacillales	5.77991	MO	5.09105	0.0282801
Bacteria.Firmicutes.Clostridia.Eubacteriales.Clostridiaceae.Clostridium	3.83762	MO	3.3673	0.0282801
Bacteria.Proteobacteria.Betaproteobacteria.Burkholderiales	3.3619	MO	3.00408	0.046533
Bacteria	5.9952	MO	3.84818	0.00902344
